# Supplementary material for: Corticotropin-releasing hormone neurons control trigeminal neuralgia-induced anxiodepression via a hippocampus-to-prefrontal circuit
Source: PubMed Central journal article supplement — Sci Adv. 2024 Jan 19;10(3):eadj4196. doi: 10.1126/sciadv.adj4196 (PMC10798562; doi:10.1126/sciadv.adj4196), 2024-01-19
Supplement: sciadv.adj4196_sm.pdf [file sciadv.adj4196_sm.pdf]

## Supplementary Materials for

### Corticotropin-releasing hormone neurons control trigeminal neuralgia-induced anxiodepression via a hippocampus-to-prefrontal circuit

Su-Su Lv *et al.*

Corresponding author: Yu-Qiu Zhang, yuqiuzhang@fudan.edu.cn

*Sci. Adv.* **10**, eadj4196 (2024)  
DOI: 10.1126/sciadv.adj4196

**The PDF file includes:**

Figs. S1 to S10  
Table S1  
Legends for data files S1 and S2

**Other Supplementary Material for this manuscript includes the following:**

Data files S1 and S2

## Supplementary Figures

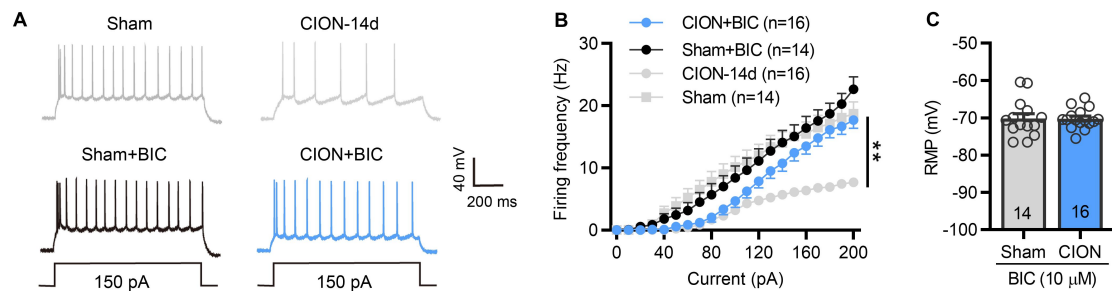

**Fig. S1. Blockade of GABA<sub>A</sub> receptors reverses the decrease in excitability of layer V mPFC pyramidal neurons induced by trigeminal neuralgia. (A)** Examples of action potentials (APs) traces evoked by depolarizing current in layer V mPFC pyramidal neurons in the presence and absence of GABA<sub>A</sub> receptor antagonist bicuculine (BIC, 10  $\mu$ M) in sham and CION-14d mice. **(B)** Bath application of BIC (10  $\mu$ M) significantly reversed the decreases firing frequency of APs evoked by depolarizing current steps of mPFC layer V pyramidal neurons in CION-14 mice, but has not effect on the input-output curves of APs in sham mice. **\*\*P < 0.01**, two-way RM ANOVA. Here, the gray line data (sham and CION-14d) are from Fig. 1C (sham and CION-14d) as a reference for BIC treatment group. **(C)** The effect of BIC on resting membrane potential (RMP) of layer V mPFC pyramidal neurons of sham- and CION-14d mice. Two-tailed Student's *t*-test. Data are expressed as means  $\pm$  SEM. Sample sizes are indicated in brackets and bars.

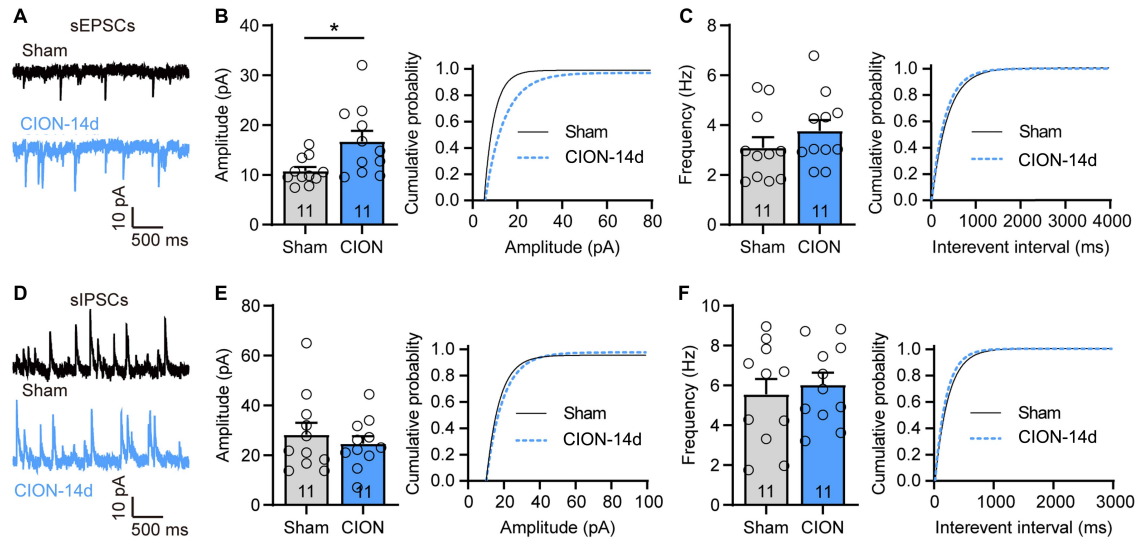

**Fig. S2. Trigeminal neuralgia increases excitatory synaptic transmission of vHPC  $\text{CaMK2A}^+$  neurons.** (A-C) Patch clamp recording of spontaneous EPSCs (sEPSCs) showing an increased amplitude of sEPSCs and a right-shifted the cumulative fraction without changes in the frequency and corresponding cumulative fraction in vHPC  $\text{CaMK2A}^+$  neurons from CION-14d mice.  $*P < 0.05$ , two-tailed Student's *t*-test. (D-F) Patch clamp recording of spontaneous IPSCs (sIPSCs) showing no difference in amplitude and frequency of sIPSCs in vHPC  $\text{CaMK2A}^+$  neurons between sham- and CION-14d mice. Two-tailed Student's *t*-test. Data are expressed as means  $\pm$  SEM. Sample sizes are indicated in bars.

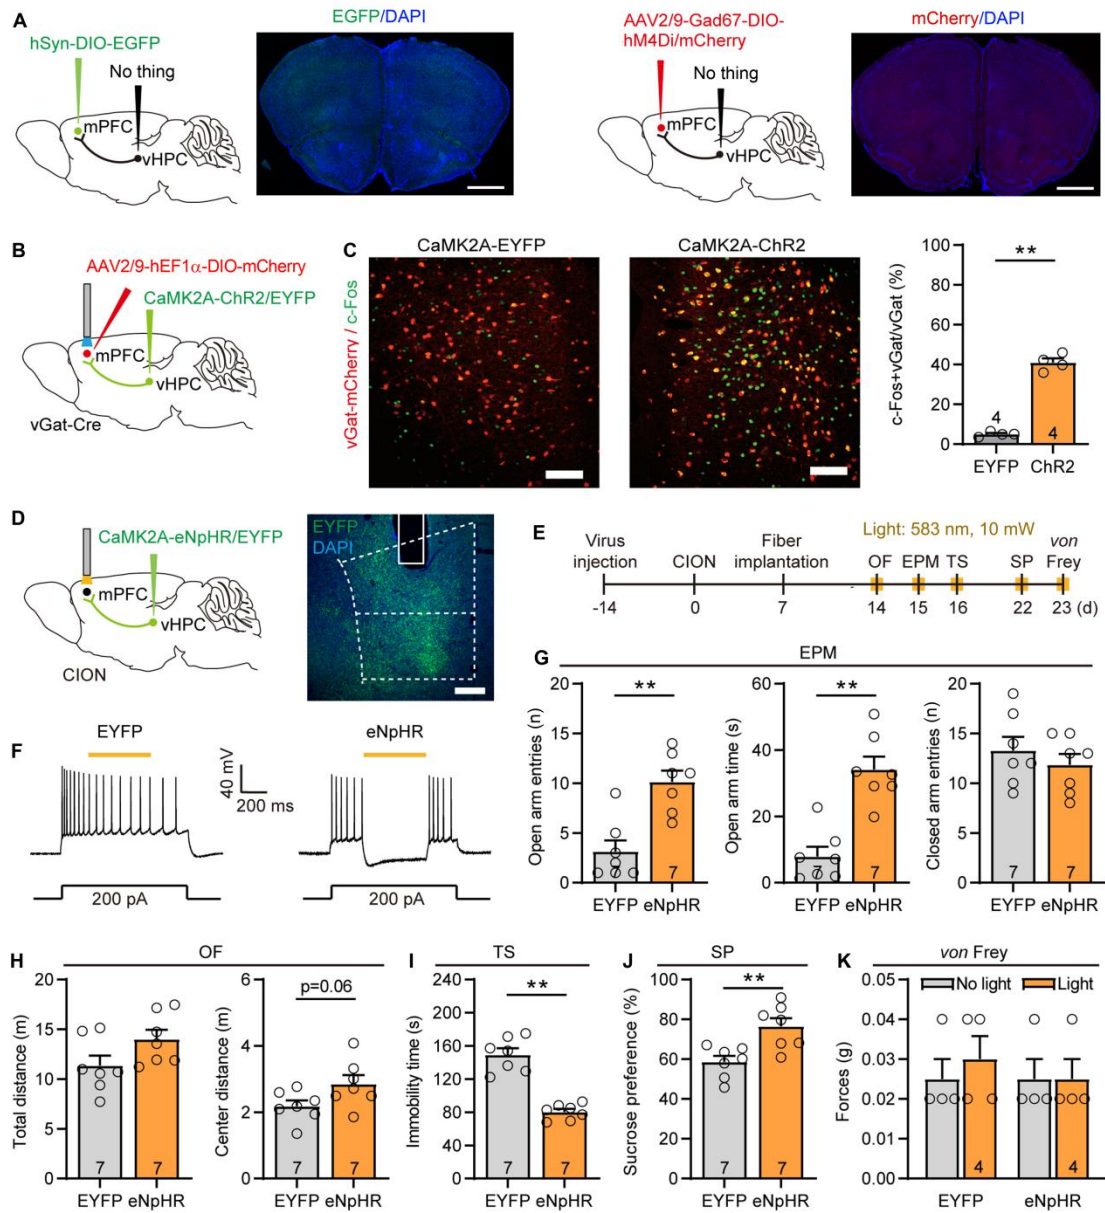

**Fig. S3. Optogenetic inhibition of vHPC<sup>CaMK2A</sup>-mPFC projections improves CION-induced anxiodepressive-like behaviors.** (A) Sagittal schematics and photomicrographs showing the specificity of AAV2/1-hSyn-Cre virus. When hSyn-DIO-EGFP (left) or Gad67-DIO-hM4Di-mCherry (right) virus was injected into the mPFC without injecting AAV2/1-hSyn-Cre into the vHPC, no EGFP<sup>+</sup> (left) or mCherry<sup>+</sup> (right) neurons were observed in the mPFC. Scale bar: 1 mm. (B) Sagittal schematic

showing specific infection of mCherry on mPFC vGat<sup>+</sup> neurons, and optogenetic manipulation of vHPC<sup>CaMK2A</sup>-positive terminals expressing Chr2 in the mPFC in vGat-Cre mice. **(C)** Optogenetic activation of vHPC CaMK2A -positive terminals expressing Chr2 in the mPFC significantly upregulates c-Fos expression in vGat<sup>+</sup> neurons in the mPFC. Scale bar: 100  $\mu$ m. \*\*P<0.01, two-tailed Student's t-test. **(D)** Sagittal schematic and photomicrograph of coronal section showing infection of vHPC CaMK2A -positive terminals in the mPFC with eNpHR or EYFP. Scale bar: 200  $\mu$ m. **(E)** Schematic of the protocol in experiments G-K. **(F)** Patch clamp recording in vHPC slices showing that APs are suppressed by yellow light stimulation (583 nm, 10 mW, continuous) in vHPC CaMK2A<sup>+</sup> neurons expressing eNpHR. **(G-J)** Optogenetic inhibition of vHPC<sup>CaMK2A</sup> -positive terminals in the mPFC ameliorates anxiodepressive-like behaviors in CION mice in elevated plus maze (EPM, G), open field (OF, H), tail suspension (TS, I) and sucrose preference (SP, J) tests. \*\*P<0.01, two-tailed Student's t-test. **(K)** Optogenetic inhibition of vHPC<sup>CaMK2A</sup>-positive terminals in the mPFC does not affect CION-induced mechanical allodynia. Two-way ANOVA. Data are expressed as means  $\pm$  SEM. Sample sizes are indicated in bars.

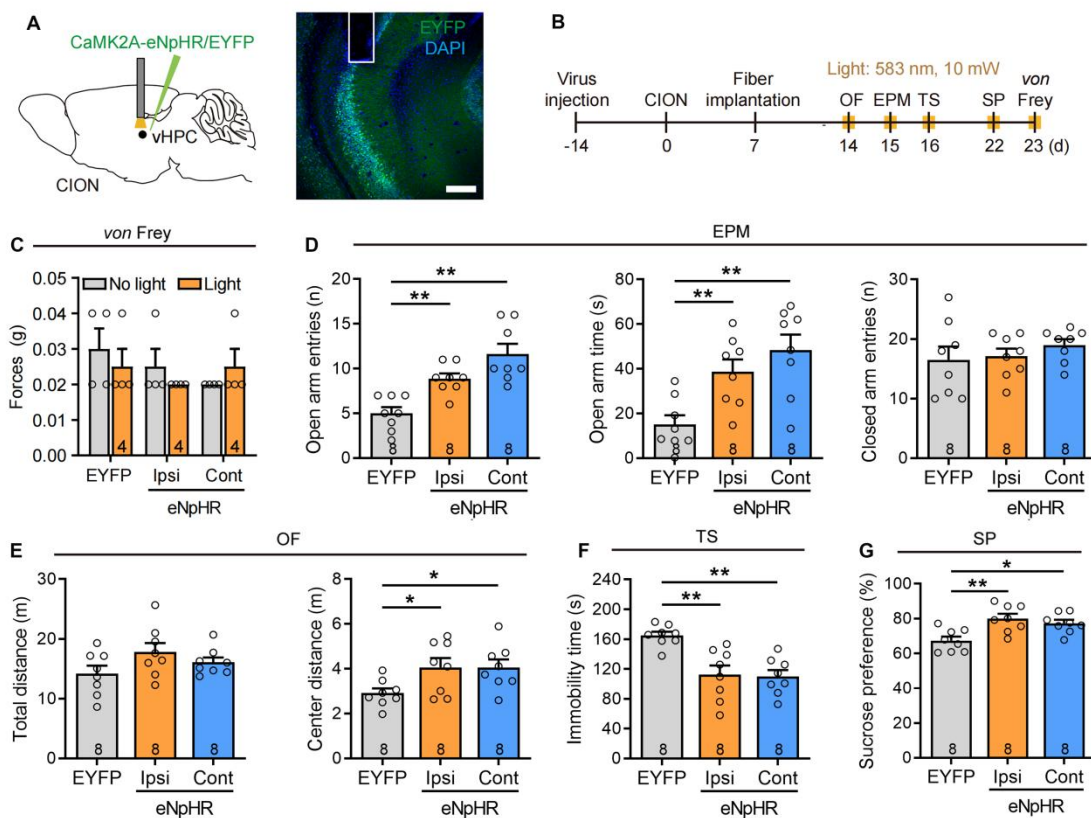

**Fig. S4. Optogenetic inhibition of vHPC CaMK2A<sup>+</sup> excitatory pyramidal neurons improves CION-induced anxiodepressive-like behaviors.** (A) Sagittal schematic and photomicrograph of coronal section showing specific infection of vHPC CaMK2A<sup>+</sup> neurons with eNpHR or EYFP. Scale bar: 200  $\mu$ m. (B) Schematic of the protocol in experiments C-G. (C) Optogenetic inhibition of vHPC CaMK2A<sup>+</sup> neurons has no effect on CION-induced mechanical allodynia in the vibrissa pad. Two-way ANOVA. (D-G) Optogenetic inhibition of CaMK2A<sup>+</sup> neurons in both ipsilateral and contralateral vHPC effectively alleviates CION-induced anxiodepressive-like behaviors in EPM (D), OF (E), TS, (F), and SP (G) tests. \*P<0.05, \*\*P<0.01, two-tailed Student's t-test. Data are expressed as means  $\pm$  SEM. Sample sizes are indicated in bars.

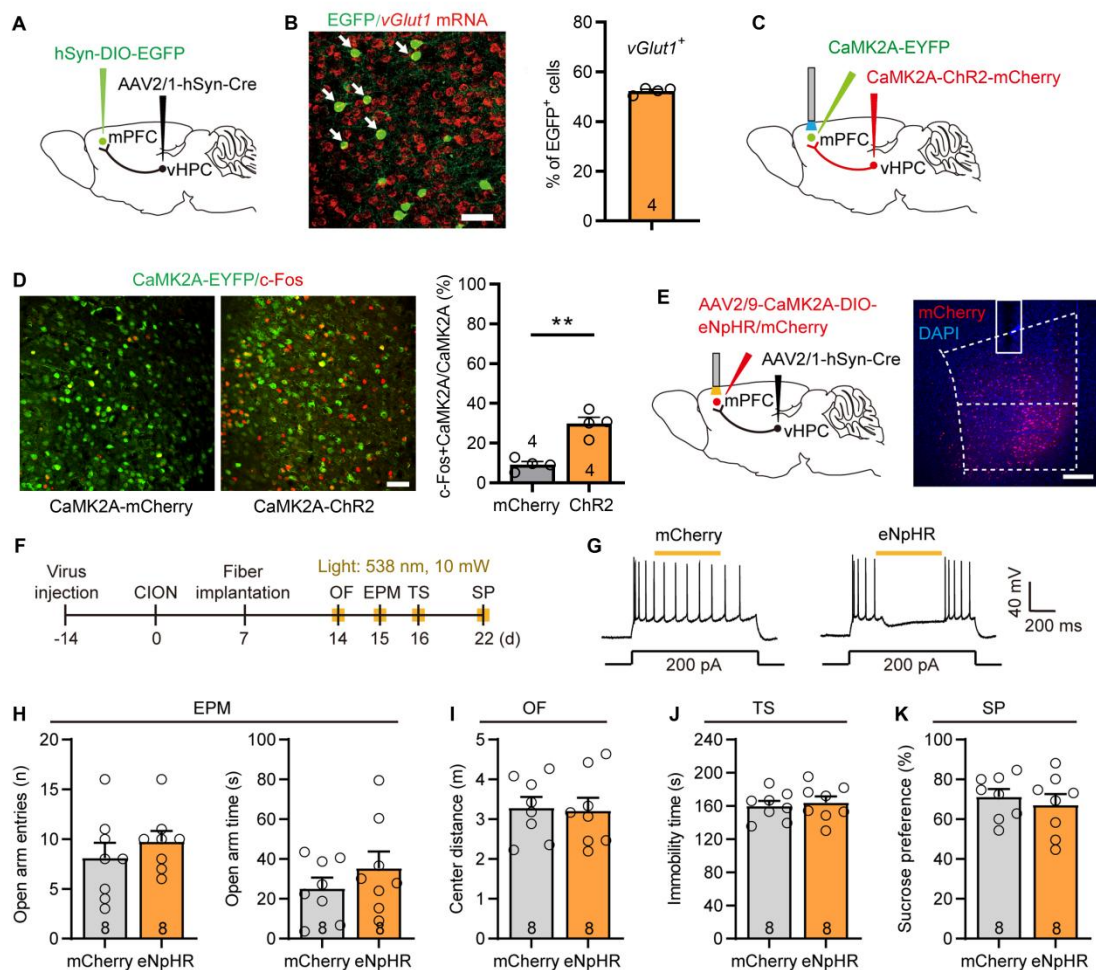

**Fig. S5. Inhibition of vHPC-mPFC<sup>CaMK2A</sup> projections does not affect CION-induced anxiodepressive behaviors.** (A) Sagittal schematic showing specific infection of EGFP on mPFC postsynaptic neurons receiving projections from the vHPC. (B) RNAscope fluorescence *in situ* hybridization (FISH) showing colocalization and proportion of *vGlut1* mRNA with mPFC postsynaptic EGFP<sup>+</sup> neurons receiving projections from the vHPC. Scale bar: 50  $\mu$ m. (C) Sagittal schematic showing specific infection of EYFP on mPFC CaMK2A<sup>+</sup> neurons, and optogenetic manipulation of vHPC<sup>CaMK2A</sup>-positive terminals expressing ChR2 in the mPFC. (D) Optogenetic activation of

vHPC<sup>CaMK2A</sup>-positive terminals expressing Chr2 in the mPFC upregulates c-Fos expression in CaMK2A<sup>+</sup> neurons in the mPFC. Scale bar: 100  $\mu$ m. \*\*P<0.01, two-tailed Student's *t*-test. **(E)** Sagittal schematic and photomicrograph of coronal section showing specific infection of eNpHR or mCherry on mPFC postsynaptic CaMK2A<sup>+</sup> neurons receiving projections from the vHPC. Scale bar: 200  $\mu$ m. **(F)** Schematic of the protocol in experiments H–K. **(G)** Patch clamp recording in mPFC slices showing that APs are suppressed by yellow light stimulation in mPFC postsynaptic CaMK2A<sup>+</sup> neuron expressing eNpHR. **(H–K)** Optogenetic inhibiting mPFC postsynaptic CaMK2A<sup>+</sup> neurons receiving projections from the vHPC does not affect CION-induced anxiodepressive-like behaviors in EPM (H), OF (I), TS (J) and SP (K) tests. Two-tailed Student's *t*-test. Data are expressed as means  $\pm$  SEM. Sample sizes are indicated in brackets and bars.



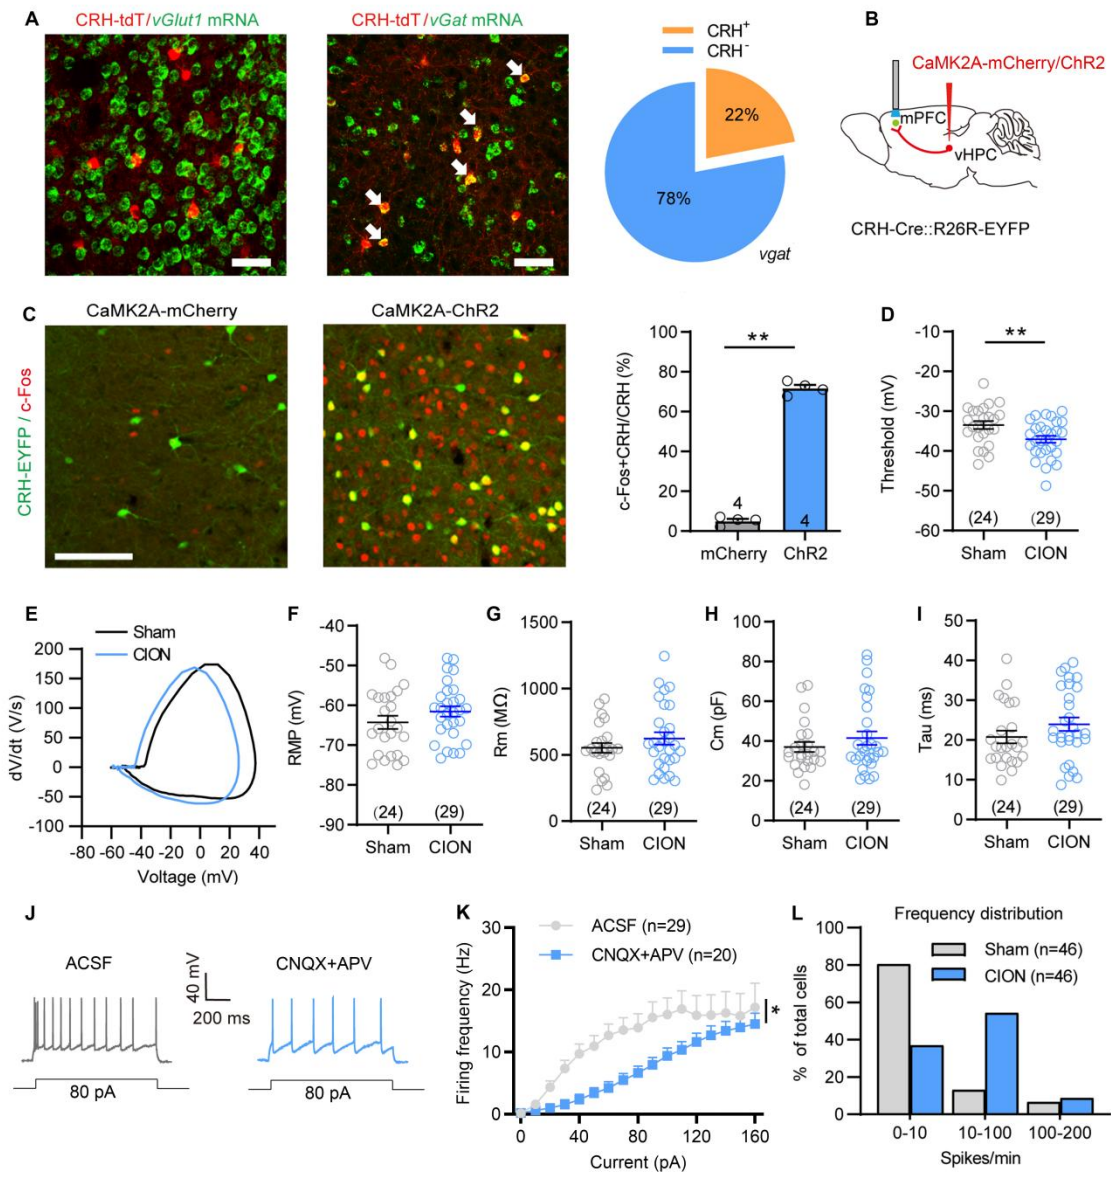

**Fig. S6. The Distribution and electrophysiological properties of CRH<sup>+</sup> neurons in the mPFC.** (A) RNAscope FISH showing co-localization of *vGlut1* mRNA or *vGat* mRNA with CRH-tdTomato (CRH-tdT) neurons in the mPFC. Arrows indicates CRH-tdT and *vGat* mRNA double-labeled cells. Scale bar: 50  $\mu$ m. (B) Sagittal schematic showing CaMK2A-ChR2 injection into the vHPC of CRH-Cre::R26R-EYFP and optogenetic manipulation of vHPC<sup>CaMK2A</sup>-positive terminals expressing ChR2 in the mPFC. (C)

Optogenetic activation of vHPC<sup>CaMK2A</sup>-positive terminals expressing Chr2 in the mPFC significantly upregulates c-Fos expression in CRH<sup>+</sup> neurons in the mPFC. Scale bar: 100  $\mu$ m. \*\*P<0.01, two-tailed Student's t-test. **(D)** CION mice have more hyperpolarized AP firing threshold in mPFC postsynaptic CRH<sup>+</sup> neurons. \*\*P<0.01, two-tailed Student's t-test. **(E)** Phase plots of the APs evoked by brief current injections in mPFC postsynaptic CRH<sup>+</sup> neurons from sham, and CION-14d mice. **(F-I)** CION does not affect RMP (F), Rm (G), Cm (H) and Tau (I) of mPFC CRH<sup>+</sup> neurons on day 14 after sham and CION. Two-tailed Student's t-test. **(J, K)** Bath application of AMPA receptor antagonist CNQX (10  $\mu$ M) and NMDA receptor antagonist APV (50  $\mu$ M) partially blocks CION-induced excitatory effects on AP firing of mPFC postsynaptic CRH<sup>+</sup> neurons from CION-14d mice. \*P<0.01, two-way RM ANOVA. Here, the gray line data (ACSF) are from Fig. 5I (CION) as a reference for CNQX+APV treatment group. **(L)** CION changes spontaneous APs frequency distribution in mPFC CRH<sup>+</sup> neurons by cell-attach recording. Data are expressed as means  $\pm$  SEM. Sample sizes are indicated in bars and brackets.

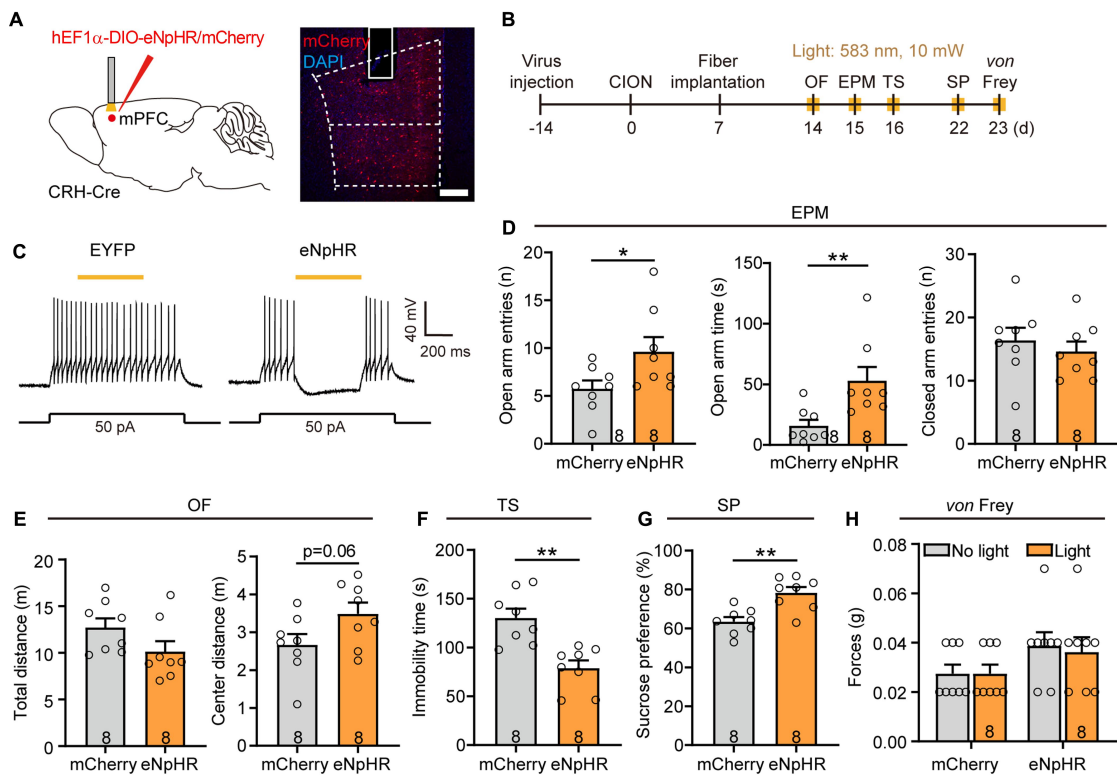

**Fig. S7. Inhibition of mPFC CRH<sup>+</sup> neurons alleviates CION-induced anxiodepressive behaviors.** (A) Sagittal schematic and photomicrograph of coronal section showing specific infection of eNpHR or EYFP on mPFC CRH<sup>+</sup> neurons in CRH-Cre mice. Scale bar: 200  $\mu$ m. (B) Schematic of the protocol in experiments D-H. (C) Patch clamp recording in mPFC slice showing that APs are suppressed by yellow light stimulation (583 nm, 5 mW, continuous) in mPFC CRH<sup>+</sup> neurons expressing eNpHR. (D-G) Optogenetic inhibition of mPFC CRH<sup>+</sup> neurons produces antianxiodepressive-like behaviors in EPM (D), OF (E), TS (F), and SP (G) tests. \*\*P<0.01, two-tailed Student's t-test. (H) Optogenetic inhibition of mPFC CRH<sup>+</sup> neurons does not affect CION-induced mechanical allodynia in the vibrissa pad in von Frey test. Two-tailed Student's t-test. Data are expressed as means  $\pm$  SEM. Sample sizes are indicated in bars.

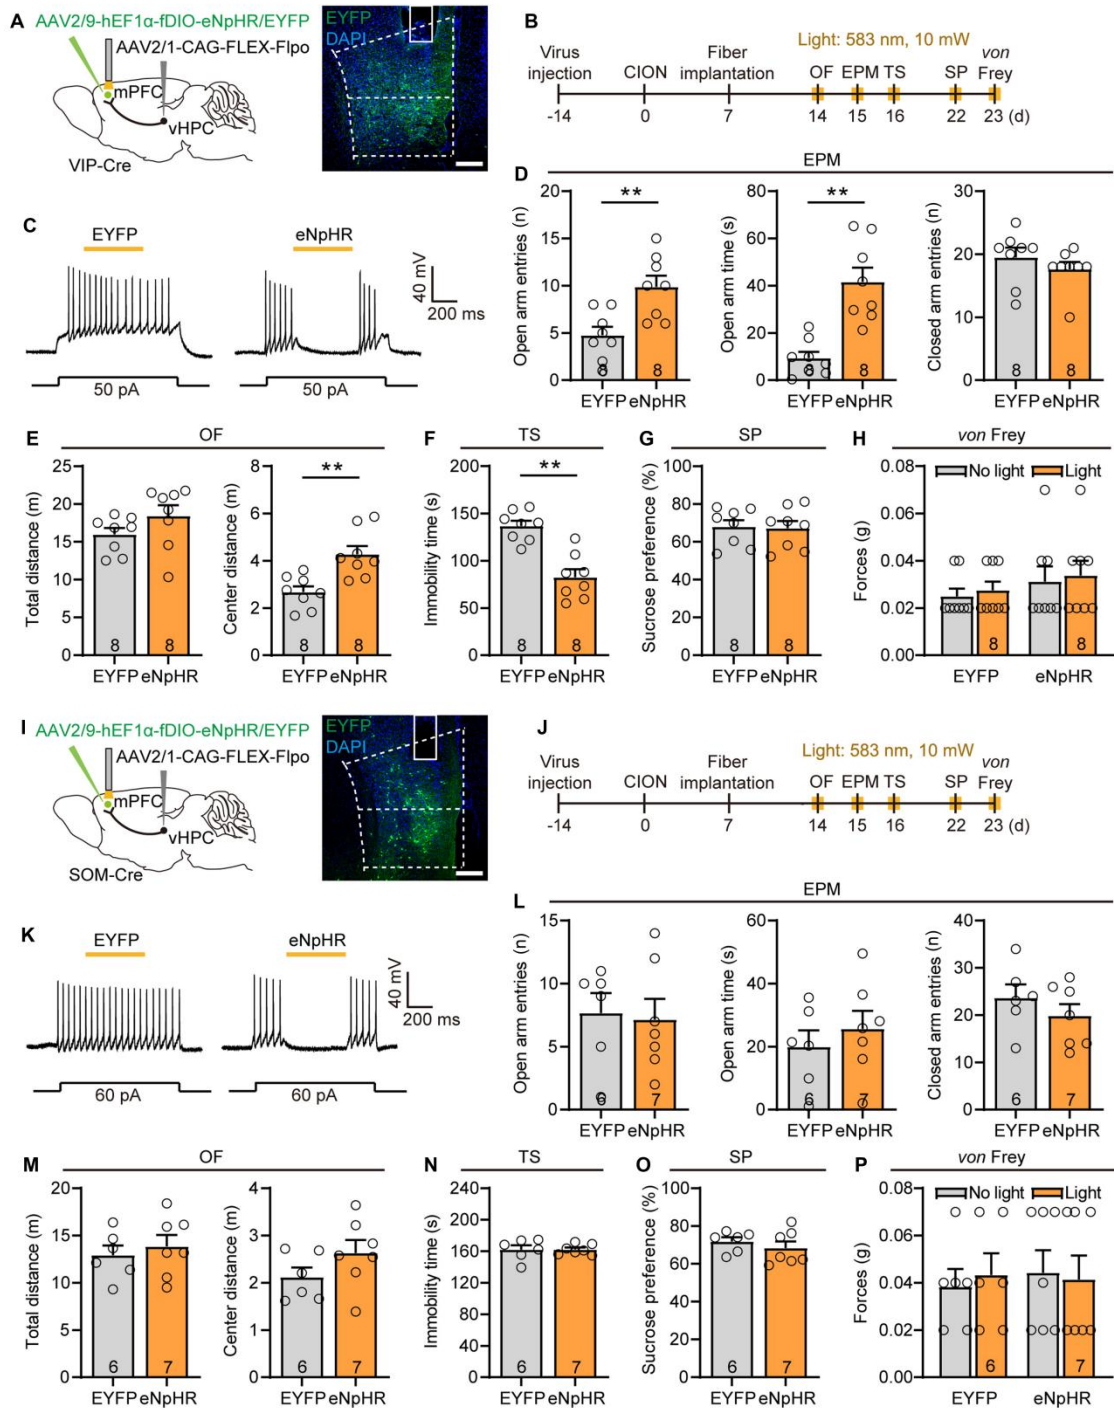

**Fig. S8. Inhibition of vHPC-mPFC<sup>VIP</sup> but not vHPC-mPFC<sup>SOM</sup> pathway alleviates CION-induced anxiodepressive behaviors.** (A) Sagittal schematic and photomicrograph of coronal section showing specific infection of eNpHR or EYFP on

mPFC postsynaptic VIP<sup>+</sup> neurons receiving projections from the vHPC in VIP-Cre mice. Scale bar: 200  $\mu$ m. **(B)** Schematic of the protocol in experiments D-H. **(C)** Patch clamp recording in mPFC slice showing that APs are suppressed by yellow light stimulation (583 nm, 5 mW, continuous) in mPFC postsynaptic VIP<sup>+</sup> neurons expressing eNpHR. **(D-F)** Optogenetic inhibition of mPFC postsynaptic VIP<sup>+</sup> neurons receiving projections from the vHPC produces anti-anxiodepressive-like behaviors in EPM (D), OF (E), and TS (F), tests. \*\*P<0.01, two-tailed Student's t-test. **(G, H)** Optogenetic inhibition of mPFC postsynaptic VIP<sup>+</sup> neurons does not affect CION-induced anhedonic-like phenotype in SP (G) test, and mechanical allodynia in the vibrissa pad in von Frey test (H). Two-tailed Student's t-test. **(I)** Sagittal schematic of photomicrograph of coronal section showing specific infection of eNpHR or EYFP on mPFC postsynaptic SOM<sup>+</sup> neurons receiving projections from the vHPC in SOM-Cre mice. Scale bar: 200  $\mu$ m. **(J)** Schematic of the protocol in experiments L-P. **(K)** Representative traces showing that APs are suppressed by yellow light stimulation in mPFC postsynaptic SOM<sup>+</sup> neuron expressing eNpHR. **(L-P)** Optogenetic inhibition of mPFC postsynaptic SOM<sup>+</sup> neurons receiving projections from the vHPC does not affect CION-induced anxiodepressive-like behaviors and mechanical allodynia. Two-tailed Student's t-test for D-G, two-way ANOVA for H. Data are expressed as means  $\pm$  SEM. Sample sizes are indicated in bars.

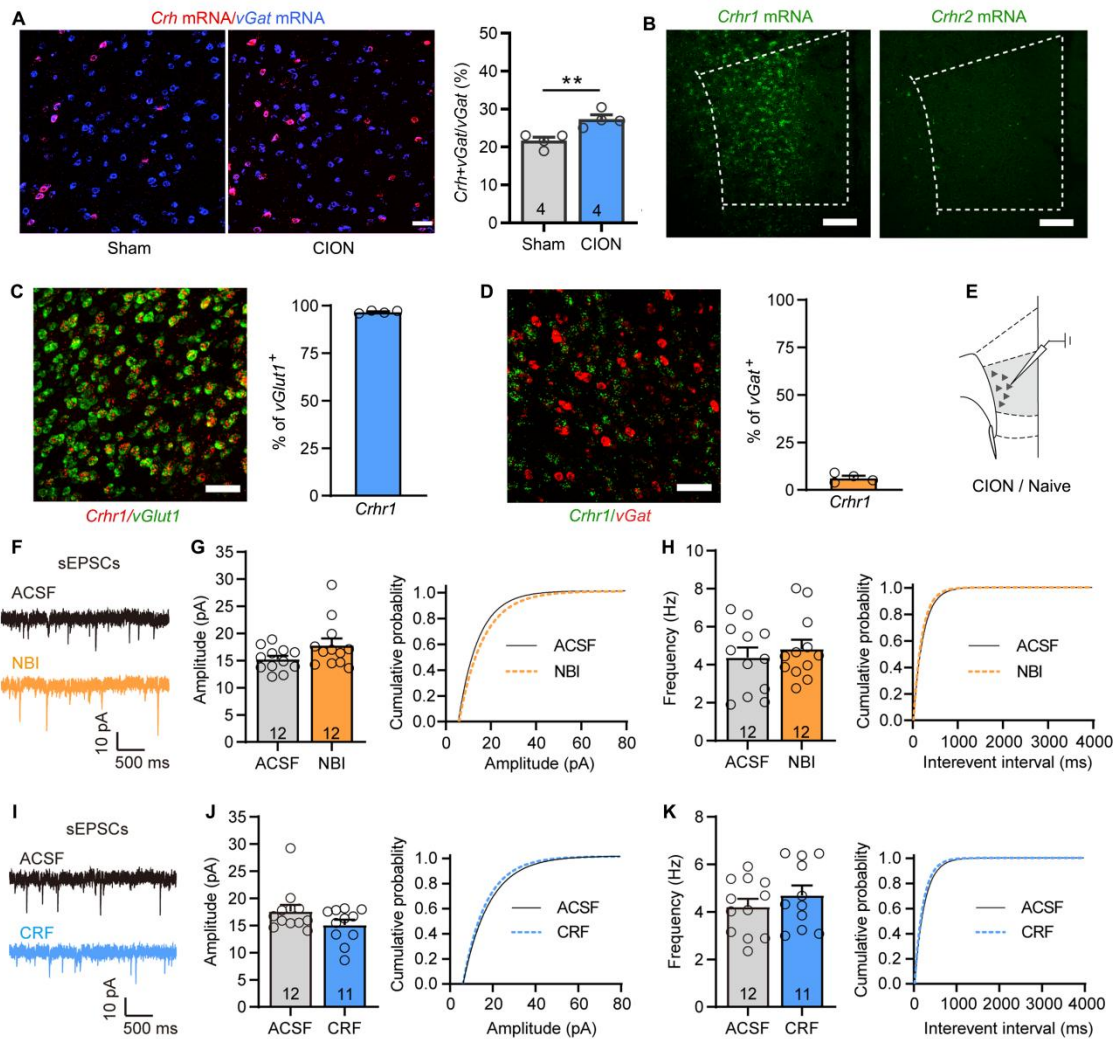

**Fig. S9. Distribution of *Crh* and *Crhr* receptors mRNA in the mPFC, and the effects of CRH-CRHR1 signaling on excitatory synaptic transmission in layer V mPFC pyramidal neurons.** (A) RNAscope FISH showing upregulated *Crh* mRNA in *vGat*<sup>+</sup> mPFC neurons in CION-14d mice. \*\*P<0.01, two-tailed Student's t-test. Scale bar: 50  $\mu$ m. (B) RNAscope FISH showing distribution of *Crhr1* and *Crhr2* mRNA in the mPFC. Scale bar: 200  $\mu$ m. (C, D) RNAscope FISH showing co-localization and proportion of *vGlut1* mRNA (C) or *vGat* mRNA (D) with neurons expressing *Crhr1* mRNA in layer V of the mPFC. Scale bar: 50  $\mu$ m. (E) Schematic showing the location of the recorded

neurons in layer V mPFC pyramidal neurons in CION-14d and naive mice. **(F-H)** Patch clamp recording of sEPSCs showing that CRHR1 antagonist NBI27914 (5  $\mu$ M) does not affect the amplitude and frequency of sEPSCs in CION-14d mice. Two-tailed Student's t-test. **(I-K)** Bath application of CRF (200 nM) does not affect the amplitude and frequency of sEPSCs in naive mice. Two-tailed Student's t-test. Data are expressed as means  $\pm$  SEM. Sample sizes are indicated in bars.

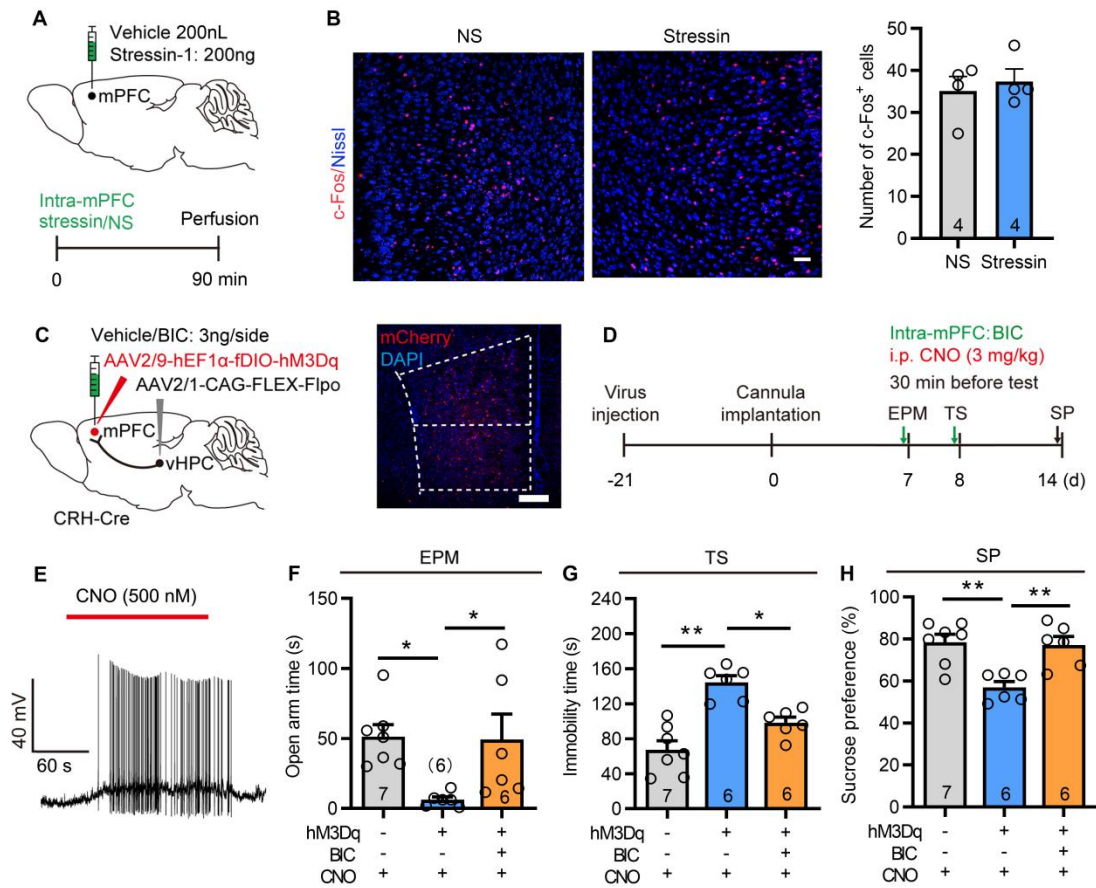

**Fig. S10. GABA<sub>A</sub> receptors in the mPFC are involved in anxiodepressive-like behaviors mediated by the vHPC-mPFC<sup>CRH</sup> pathway.** (A) Sagittal schematic of intra-mPFC injection and the protocol for experiment B. (B) Compared with equal volume normal saline injection, intra-mPFC injection of CRHR1 agonist stressin-1 (200 ng/0.2 μL) does not alter c-Fos expression level in mPFC neurons. Scale bar: 50 μm. Two-tailed Student's *t*-test. (C) Sagittal schematic and photomicrograph of coronal section showing specific infection of hM3Dq or mCherry on mPFC postsynaptic CRH<sup>+</sup> neurons receiving projections from the vHPC and GABA<sub>A</sub> receptor antagonist BIC (3 ng/0.2 μL) injection into the mPFC of CRH-Cre mice. Scale bar: 200 μm. (D) Schematic



of the protocol in experiments F-H. **(E)** In current clamp model, application of CNO (500 nM) evokes spontaneous APs in a mPFC postsynaptic CRH<sup>+</sup> neuron expressing hM3Dq. **(F-H)** Chemogenetic activation of mPFC postsynaptic CRH<sup>+</sup> neurons receiving projections from the vHPC produces anxiodepressive-like behaviors in naive mice, which is significantly improved by intra-mPFC injection of BIC in EPM (F), TS (G) and SP (H) tests. \* $P < 0.05$ , \*\* $P < 0.01$ , one-way ANOVA followed by post hoc Dunn's test. Data are expressed as means  $\pm$  SEM. Sample sizes are indicated in bars.

**Table S1.** The key resources and reagents used in the present study.

| REAGENT or RESOURCE                                                                         | SOURCE            | IDENTIFIER                            |
|---------------------------------------------------------------------------------------------|-------------------|---------------------------------------|
| Antibodies                                                                                  |                   |                                       |
| Chicken polyclonal anti GFP (1:1000)                                                        | Aves labs         | CAT# GFP-1020<br>RRID:AB_10000240     |
| Rabbit anti-RFP (1:1000)                                                                    | Rockland          | CAT# 600-401-379s<br>RRID:AB_11182807 |
| Rabbit anti c-Fos (1:2000)                                                                  | Abcam             | CAT# ab190289<br>RRID: AB_2737414     |
| Donkey anti-Rabbit 546 (1:500)                                                              | Invitrogen        | CAT# A10040;<br>RRID:AB_2534016       |
| Donkey Anti-Chicken 488 (1:500)                                                             | Jackson           | CAT# 703-545-155;<br>RRID:AB_2340375  |
| Donkey Anti-Rabbit 647 (1:500)                                                              | Jackson           | CAT# 711-605-152;<br>RRID: AB_2492288 |
| Bacterial and Virus Strains                                                                 |                   |                                       |
| AAV2/9-CaMKIIa-ChR2-EYFP<br>(titer: $3.04 \times 10^{12}$ V.G./ml )                         | BrainVTA, Wuhan   | CAT# PT-0004                          |
| AAV2/9-CaMKIIa-ChR2-mCherry<br>(titer: $1.06 \times 10^{13}$ V.G./ml )                      | OBiO, Shanghai    | CAT# 26975                            |
| AAV2/9-hEF1a-fDIO-ChR2<br>(titer: $1.44 \times 10^{13}$ V.G./ml )                           | Taitool, Shanghai | CAT# S0404-9                          |
| AAV2/9-CaMKIIa-eNpHR-EYFP<br>(titer: $8.14 \times 10^{12}$ V.G./ml )                        | OBiO, Shanghai    | CAT# 26971                            |
| AAV2/retro-CAG-tdTomato-WPRE-pA<br>(titer: $1.23 \times 10^{12}$ V.G./mL)                   | Sunbio, Shanghai  | CAT# pmt114-retro                     |
| AAV2/9-EF1 $\alpha$ -DIO-eNpHR-mCherry<br>(titer: $2.48 \times 10^{12}$ V.G./ml )           | BrainVTA, Wuhan   | CAT# PT-0007                          |
| AVV2/9-hEF1 $\alpha$ -fDIO-eNpHR-EYFP<br>(titer: $2.37 \times 10^{13}$ V.G./ml )            | Taitool, Shanghai | CAT# S0357-9                          |
| AAV2/9-CaMKIIa-DIO-eNpHR-mCherry<br>(titer: $5.18 \times 10^{12}$ V.G./ml )                 | BrainVTA, Wuhan   | CAT# PT-2060                          |
| AAV2/9-hEF1 $\alpha$ -fDIO-hM3Dq-mCherry<br>(AAV2/9, titer: $1.32 \times 10^{13}$ V.G./ml ) | Taitool, Shanghai | CAT# S0337-9                          |
| AAV2/9-GAD67-DIO-hM4Di-mCherry<br>(titer: $1.21 \times 10^{13}$ V.G./ml )                   | OBiO, Shanghai    | CAT# H15084                           |

|                                                                               |                   |                                |
|-------------------------------------------------------------------------------|-------------------|--------------------------------|
| AAV2/9-CaMKIIa-GCaMP6s<br>(titer: $2.72 \times 10^{12}$ V.G./ml )             | BrainVTA, Wuhan   | CAT# PT-0110                   |
| AAV2/1-hSyn-Cre<br>(titer: $1.05 \times 10^{13}$ V.G./ml )                    | BrainVTA, Wuhan   | CAT# PT-0136                   |
| AAV2/1-hSyn-Flpo<br>(titer: $1.92 \times 10^{13}$ V.G./ml )                   | Taitool, Shanghai | CAT# S0271-1                   |
| AAV2/1-CAG-FLEX-Flpo<br>(titer: $1.52 \times 10^{13}$ V.G./ml )               | Taitool, Shanghai | CAT# S0273-1                   |
| AAV2/9-CaMKIIa-mCherry<br>(titer: $4.68 \times 10^{12}$ V.G./ml )             | OBiO, Shanghai    | CAT# AOV013                    |
| AAV2/9-CaMKIIa-EYFP<br>(titer: $1.70 \times 10^{13}$ V.G./ml )                | OBiO, Shanghai    | CAT# AOV016                    |
| AAV2/9-EF1 $\alpha$ -DIO-mCherry<br>(titer: $2.51 \times 10^{12}$ V.G./ml )   | BrainVTA, Wuhan   | CAT# PT-0013                   |
| AAV2/9-hsyn-DIO-EGFP<br>(titer: $1.51 \times 10^{13}$ V.G./ml )               | Sunbio, Shanghai  | CAT# pmt465                    |
| AAV2/9-hEF1 $\alpha$ -fDIO-mCherry<br>(titer: $1.91 \times 10^{13}$ V.G./ml ) | Taitool, Shanghai | CAT# S0553-9                   |
| AAV2/9-hEF1 $\alpha$ -fDIO-EYFP<br>(titer: $1.53 \times 10^{13}$ V.G./ml )    | Taitool, Shanghai | CAT# S0253-9                   |
| AAV2/9-CaMKIIa-DIO-mCherry<br>(titer: $2.60 \times 10^{12}$ V.G./ml )         | BrainVTA, Wuhan   | CAT# PT-1167                   |
| AAV2/9-GAD67-DIO-mCherry<br>(titer: $1.27 \times 10^{13}$ V.G./ml )           | OBiO, Shanghai    | CAT# H19924                    |
| Chemicals, Peptides, and Recombinant Proteins                                 |                   |                                |
| CRF (human, rat) acetate salt                                                 | Bachem            | CAT# 4011473<br>CAS 86784-80-7 |
| Stressin I                                                                    | Tocris            | CAT# 1608<br>CAS TP2125        |
| NBI 27914 hydrochloride                                                       | Tocris            | CAT# 1591<br>CAS 1215766-76-9  |
| 1(S),9(R)-(-)-Bicuculline methbromide (BIC)                                   | Sigma             | CAT# B7561<br>CAS 66016-70-4   |
| 6-cyano-7-Nitroquinoxaline-2,3-dione<br>(CNQX)                                | Sigma             | CAT# C127<br>CAS 115066-14-3   |
| 2-Amino-5-phosphonovaleric acid (APV)                                         | Sigma             | CAT# A5282<br>CAS 76326-31-3   |
| GDP- $\beta$ -S                                                               | Sigma             | CAT# G7637<br>CAS 97952-36-8   |

|                                        |                           |                                 |
|----------------------------------------|---------------------------|---------------------------------|
| Clozapine-n-oxide (CNO)                | MedChemExpress            | CAT# HY-17366<br>CAS 34233-69-7 |
| RNAscope probes                        |                           |                                 |
| RNAscope®Probe-Mm-Slc17a7-C3(vGlut1)   | ACDBio                    | CAT# 416631-C3                  |
| RNAscope®Probe-Mm-Slc32a1-C2 (vGat)    | ACDBio                    | CAT# 319191-C2                  |
| RNAscope® Probe- Mm-Crh-C1             | ACDBio                    | CAT# 316091-C1                  |
| RNAscope® Probe- Mm-Crhr1-C1           | ACDBio                    | CAT# 418011-C1                  |
| RNAscope® Probe- Mm-Crhr2-C1           | ACDBio                    | CAT# 413201-C1                  |
| Experimental Models: Organisms/Strains |                           |                                 |
| CRH-ires-Cre                           | The Jackson<br>Laboratory | JAX012704                       |
| VIP-ires-Cre                           | The Jackson<br>Laboratory | JAX010908                       |
| SOM- ires-Cre                          | The Jackson<br>Laboratory | JAX028864                       |
| Ai14                                   | The Jackson<br>Laboratory | JAX007914                       |
| R26R-EYFP                              | The Jackson<br>Laboratory | JAX006148                       |
| Software and Algorithms                |                           |                                 |
| GraphPad Prism 8                       | GrapPad Software          | www.graphpad.com                |
| pClamp 10.6                            | Molecular Devices         | www.moleculardevices.com        |
| MATLAB                                 | MathWorks                 | ww2.mathworks.cn                |

Data file S1: Data statistics

Data file S2: Original data
